# Supplementary material for: Selective adsorption of Hg(ii) with diatomite-based mesoporous materials functionalized by pyrrole–thiophene copolymers: condition optimization, application and mechanism
Source: Royal Society of Chemistry journal article supplement (doi:10.1039/d2ra05938j), 2022-01-01
Supplement: d2ra05938j1.pdf [file d2ra05938j1.pdf]

**Supporting Information**

**Selective adsorption towards Hg(II) with diatomite-based mesoporous material functionalized by copolymer of pyrrole-thiophene: Condition optimization, application and mechanism**

**Yu Zhou<sup>a,ξ</sup>, Zheng Zeng<sup>a,ξ</sup>, Yongfu Guo<sup>a,b,\*</sup>, Xinyu Zheng<sup>a,\*</sup>**

<sup>a</sup> Department of Municipal Engineering, Suzhou University of Science and Technology, Suzhou 215009, China

<sup>b</sup> Jiangsu Collaborative Innovation Center of Technology and Material of Water Treatment, Suzhou 215009, Jiangsu, China

<sup>ξ</sup> These authors contributed equally to this work.

---

\* Corresponding author.

*E-mail address:* yongfuguo@163.com (Y. Guo), xinyuzheng@mail.usts.edu.cn (X. Zheng)

## 1. SEM

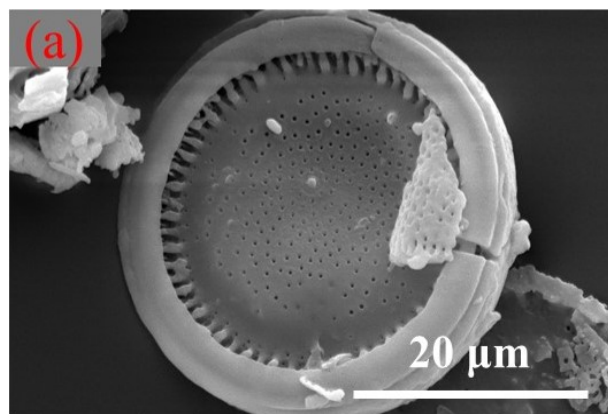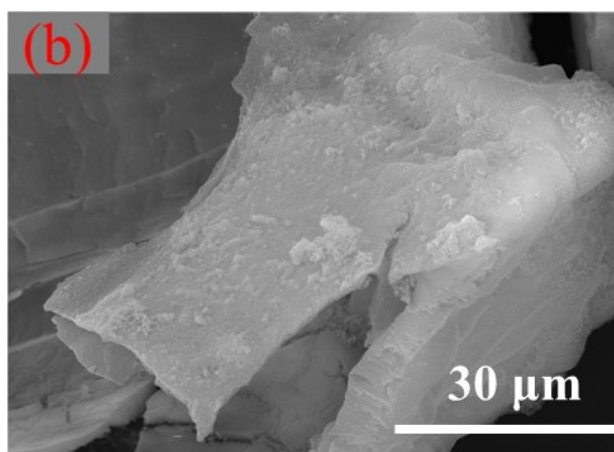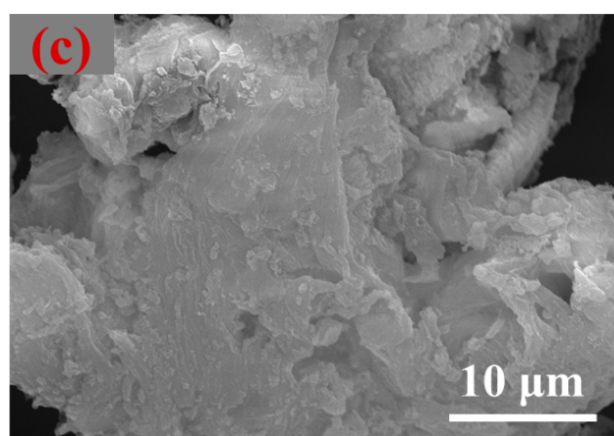

**Fig. S1.** SEM images of DMTs (a), MCM-41 (b) and MCM-41/co-(PPy-Tp) (c).

## 2. EDS

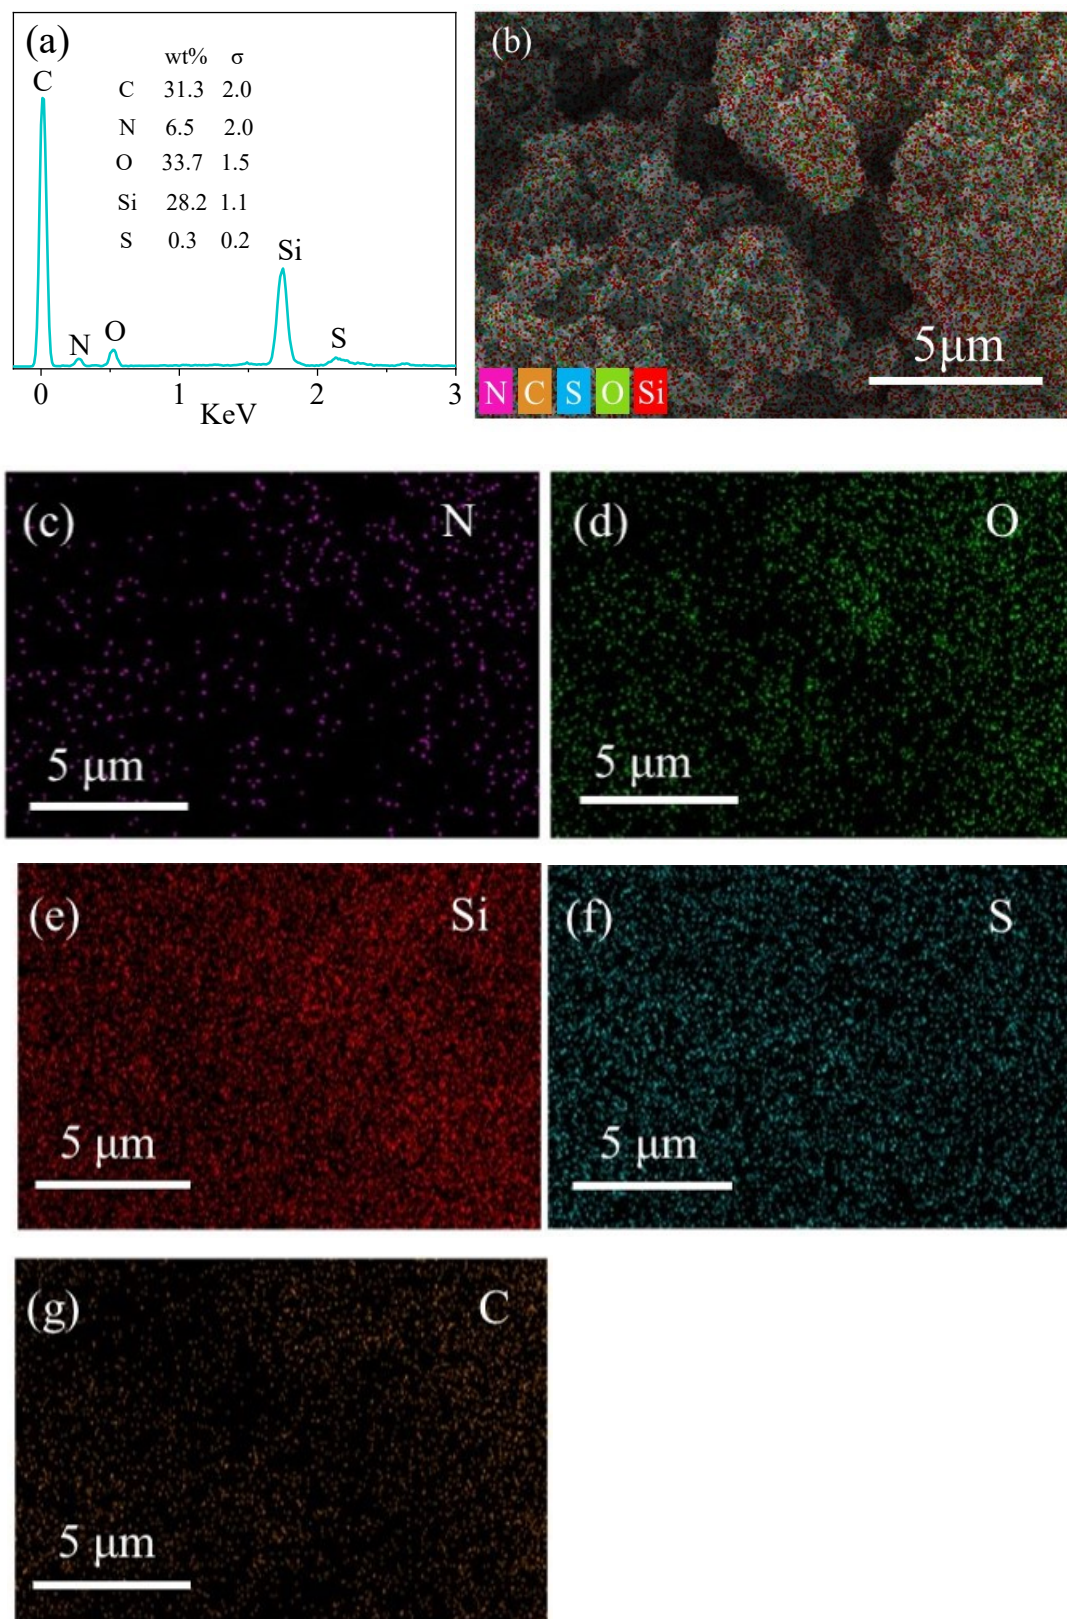

Fig. S2. EDS and mapping of MCM-41/co-(PPy-Tp).

### 3. Response surface methodology design

**Table S1.** MCM-41/co-(PPy-Tp) response surface design.

| Std. | Run | Variables |       |           |            | $q_e$ |
|------|-----|-----------|-------|-----------|------------|-------|
|      |     | pH (A)    | T (B) | $C_0$ (C) | Dosage (D) |       |
| 1    | 28  | 5         | 25    | 40        | 0.06       | 464   |
| 2    | 24  | 9         | 25    | 40        | 0.06       | 499   |
| 3    | 11  | 5         | 45    | 40        | 0.06       | 516   |
| 4    | 7   | 9         | 45    | 40        | 0.06       | 516   |
| 5    | 23  | 7         | 35    | 20        | 0.04       | 439   |
| 6    | 3   | 7         | 35    | 60        | 0.04       | 440   |
| 7    | 18  | 7         | 35    | 20        | 0.08       | 461   |
| 8    | 22  | 7         | 35    | 60        | 0.08       | 492   |
| 9    | 1   | 5         | 35    | 40        | 0.04       | 452   |
| 10   | 15  | 9         | 35    | 40        | 0.04       | 472   |
| 11   | 16  | 5         | 35    | 40        | 0.08       | 466   |
| 12   | 25  | 9         | 35    | 40        | 0.08       | 497   |
| 13   | 8   | 7         | 25    | 20        | 0.06       | 481   |
| 14   | 27  | 7         | 45    | 20        | 0.06       | 492   |
| 15   | 9   | 7         | 25    | 60        | 0.06       | 484   |
| 16   | 12  | 7         | 45    | 60        | 0.06       | 505   |
| 17   | 4   | 5         | 35    | 20        | 0.06       | 478   |
| 18   | 10  | 9         | 35    | 20        | 0.06       | 506   |
| 19   | 20  | 5         | 35    | 60        | 0.06       | 499   |
| 20   | 19  | 9         | 35    | 60        | 0.06       | 510   |
| 21   | 13  | 7         | 25    | 40        | 0.04       | 435   |
| 22   | 2   | 7         | 45    | 40        | 0.04       | 465   |
| 23   | 29  | 7         | 25    | 40        | 0.08       | 453   |
| 24   | 17  | 7         | 45    | 40        | 0.08       | 503   |
| 25   | 6   | 7         | 35    | 40        | 0.06       | 528   |
| 26   | 5   | 7         | 35    | 40        | 0.06       | 536   |
| 27   | 21  | 7         | 35    | 40        | 0.06       | 535   |
| 28   | 26  | 7         | 35    | 40        | 0.06       | 529   |
| 29   | 14  | 7         | 35    | 40        | 0.06       | 532   |

**Table S2.** Quadratic model ANOVA analysis.

| Source           | Sum of squares | df | Mean square | F-value  | P-value  |               |
|------------------|----------------|----|-------------|----------|----------|---------------|
| Model            | 171464.1       | 14 | 12247       | 2184.9   | < 0.0001 | Significant   |
| A-pH             | 98176.04       | 1  | 98176.04    | 17514    | < 0.0001 |               |
| B-T              | 4401.04        | 1  | 4401.04     | 785.12   | < 0.0001 |               |
| C-C <sub>0</sub> | 7455.38        | 1  | 7455.375    | 1330     | < 0.0001 |               |
| D-Dosage         | 1335.04        | 1  | 1335.042    | 238.16   | < 0.0001 |               |
| AB               | 3751.56        | 1  | 3751.56     | 669.3    | < 0.0001 |               |
| AC               | 4522.56        | 1  | 4522.56     | 806.8    | < 0.0001 |               |
| AD               | 1785.06        | 1  | 1785.06     | 318.44   | < 0.0001 |               |
| BC               | 770.062        | 1  | 770.06      | 137.37   | < 0.0001 |               |
| BD               | 1387.56        | 1  | 1387.56     | 247.53   | < 0.0001 |               |
| CD               | 18.07          | 1  | 18.07       | 3.22     | 0.0928   |               |
| A <sup>2</sup>   | 37697.86       | 1  | 37697.86    | 6725.1   | < 0.0001 |               |
| B <sup>2</sup>   | 2714.36        | 1  | 2714.36     | 484.23   | < 0.0001 |               |
| C <sup>2</sup>   | 11328.57       | 1  | 11328.57    | 2021     | < 0.0001 |               |
| D <sup>2</sup>   | 9589.36        | 1  | 9589.36     | 1710.7   | < 0.0001 |               |
| Residual         | 84.083         | 15 | 5.61        |          |          |               |
| Lack of Fit      | 74.75          | 10 | 7.48        | 4.004464 | 0.0395   | Insignificant |
| Pure Error       | 9.33           | 5  | 1.867       |          |          |               |
| Cor Total        | 171548.2       | 29 |             |          |          |               |

## 4. Models of adsorption kinetics

Pseudo-first-order model:

$$\ln(q_e - q_t) = \ln q_e - k_1 t \quad (\text{S1})$$

Pseudo-second-order model:

$$q_t = K_d t^{1/2} + C \quad (\text{S2})$$

Intra-particle diffusion model:

$$q_t = K_d t^{1/2} + C \quad (\text{S3})$$

Elovich model:

$$q_t = \frac{1}{\beta} \ln(\alpha\beta) + \frac{1}{\beta} \ln t \quad (\text{S4})$$

Double constant equations models:

$$\ln q_t = \ln A + B \ln t \quad (\text{S5})$$

where,  $q_e$  (mg/g) is the equilibrium adsorption capacity;  $q_t$  (mg/g) is the adsorption capacity at time  $t$  (min);  $K_1$  ( $\text{min}^{-1}$ ) is the first order adsorption rate constant;  $K_2$  ( $\text{mg}/(\text{g}\cdot\text{min})$ ) is the second order adsorption rate constant;  $K_d$  ( $\text{mg}/(\text{g}\cdot\text{min}^{0.5})$ ) is the intraparticle diffusion rate constant;  $\alpha$  and  $\beta$  are the constants of Elovich, which represent the initial adsorption rate constant and desorption rate constant, respectively ( $\text{mg}/(\text{g}\cdot\text{min})$  and  $\text{g}/\text{mg}$ );  $\alpha$  and  $\beta$  are equation parameters and  $C$  (mg/g) is the boundary layer thickness.

## 5. Adsorption isothermal models

Langmuir model (Eq. (S6)) is usually used to describe single-layer adsorption and indicates that adsorption occurs on the surfaces with the same sites. Freundlich model (Eq. (S7)) is used to describe the adsorption process on non-uniform surfaces and generally

considers the possibility of single-layer adsorption and multi-layer adsorption. Temkin isotherm model (Eq. (S8)) and Dubinin-Radushkevich (D-R) model (Eq. (S9)) were also used to fit mercury adsorption process.

$$\frac{C_e}{q_e} = \frac{C_e}{Q_m} + \frac{1}{Q_m K_L} \quad (S6)$$

$$\ln q_e = \ln K_f + \frac{1}{n} \ln C_e \quad (S7)$$

$$q_e = B \ln K_T + B \ln C_e \quad (S8)$$

$$\ln q_e = \ln Q_m - \beta \varepsilon^2 \quad (S9)$$

$$E = \frac{1}{(2\beta)^{1/2}} \quad (S10)$$

where,  $K_L$  is adsorption constant.  $Q_m$  is maximum adsorption capacity (mg/g).  $K_f$  is Freundlich constant.  $n$  is adsorption intensity.  $B$  and  $K_T$  are Temkin isotherm constants.  $\varepsilon$  is Polanyi potential and  $\beta$  is D-R isotherm constant.  $E$  (kJ/mol) is the average adsorption energy per mole of metal ions transferring from liquid phase to the surface of the adsorbent.

## 6. Model of Thermodynamics

$$\Delta G^0 = -RT \ln K_R \quad (S10)$$

$$\ln K_R = \frac{\Delta S^0}{R} - \frac{\Delta H^0}{RT} \quad (S11)$$

where,  $K_R$  is equilibrium constant;  $R$  is gas constant (8.314 J/mol/K).
